# Supplementary material for: Excellent Electrocatalytic Hydrogen Evolution Reaction Performances of Partially Graphitized Activated-Carbon Nanobundles Derived from Biomass Human Hair Wastes
Source: MDPI journal article supplement (doi:10.3390/nano12030531), 2022-02-03
Supplement: s1 [file s1]

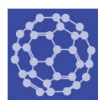

# Excellent Electrocatalytic Hydrogen Evolution Reaction Performances of Partially-Graphitized Activated-Carbon Nanobundles-Derived from Biomass Human Hair Wastes

Sankar Sekar<sup>1,2</sup>, Dae Hyun Sim<sup>1,2</sup> and Sejoon Lee<sup>1,2,\*</sup>

<sup>1</sup> Department of Semiconductor Science, Dongguk University-Seoul, Seoul 04620, Korea; sanssekar@gmail.com (S.S.); gee04143@hanmail.net (D.H.S.)

<sup>2</sup> Quantum-functional Semiconductor Research Center, Dongguk University-Seoul, Seoul 04620, Korea

\* Correspondence: sejoon@dongguk.edu

## 1. Elemental Characteristics of HH-AC

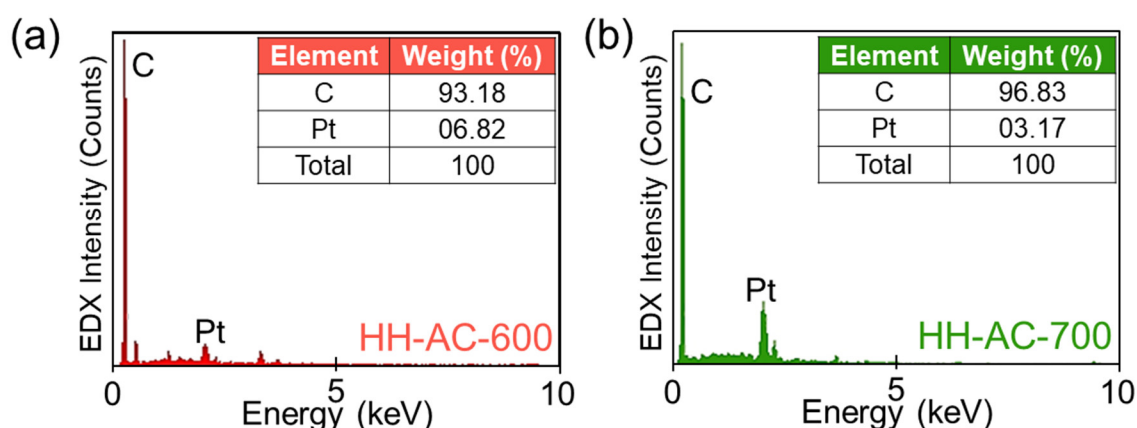

**Figure S1.** EDX spectra of the (a) HH-AC-600 and (b) HH-AC-700 samples. The small amounts of Pt arose from the ultrathin Pt conducting layer, which had been coated on the samples for better visualization of the FE-SEM images.

## 2. Electrochemical Properties of HH-AC before and after Durability Test

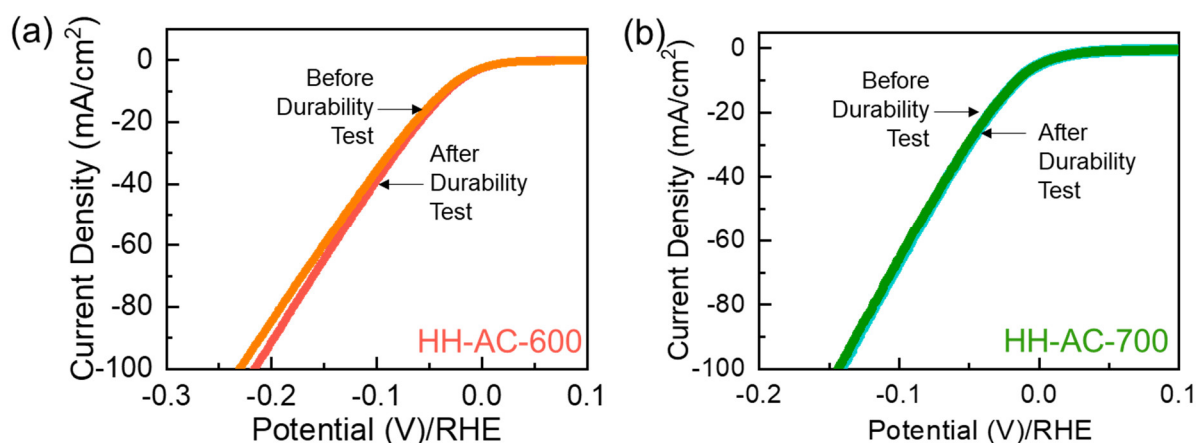

**Figure S2.** LSV curves of the (a) HH-AC-600 and (b) HH-AC-700 electrodes for HER before and after the durability test.
